# Supplementary material
Source: PubMed Central journal article supplement (PMC7372940)
Supplement: NIHMS1602940-supplement-Table_S1__Primary_data.pdf [file NIHMS1602940-supplement-Table_S1__Primary_data.pdf]

## Supplementary Materials for

### **Tuberculosis following PD-1 blockade for cancer immunotherapy**

Daniel L. Barber\*, Shunsuke Sakai, Ragini R. Kudchadkar, Steven P. Fling, Tracey A. Day, Julie A. Vergara, David Ashkin, Jonathan H. Cheng, Lisa M. Lundgren, Vanessa N. Raabe, Colleen S. Kraft, Jorge J. Nieva, Martin A. Cheever, Paul T. Nghiem, Elad Sharon\*

\*Corresponding author. Email: [barberd@niaid.nih.gov](mailto:barberd@niaid.nih.gov) (D.L.B.); [sharone@mail.nih.gov](mailto:sharone@mail.nih.gov) (E.S.)

Published 16 January 2019, *Sci. Transl. Med.* **11**, eaat2702 (2019)  
DOI: 10.1126/scitranslmed.aat2702

#### **The PDF file includes:**

Table S1. Primary data.

## Supplementary Material

Table S1. Primary data.

|                         |                                       | <b>Pre-treatment</b> | <b>cycle 5</b> | <b>cycle 8</b>  | <b>cycle 11</b> | <b>cycle 14</b> |
|-------------------------|---------------------------------------|----------------------|----------------|-----------------|-----------------|-----------------|
|                         |                                       | <b>6/3/15</b>        | <b>8/28/15</b> | <b>10/29/15</b> | <b>12/29/15</b> | <b>4/15/16</b>  |
| <b><u>Figure 3C</u></b> | % of CD4 T cells either IFNg+ or TNF+ | 0.0087               | 0.172          | 0.0887          | 0.014           | 0.091           |
| <b><u>Figure 3D</u></b> | % of IL-17A+ CD4 T cells              | 0                    | 0.0021         | 0.002           | 0.0013          | 0.0032          |
| <b><u>Figure 3E</u></b> | % of CD8 T cells either IFNg+ or TNF+ | 0.0003               | 0.0017         | 0.0022          | 0.015           | 0.001           |

**Figure 4**

|                   | Negative control |        | 6/03/2015     |         | 8/28/2015     |        | 10/29/2015    |        | 12/29/2015    |        | 4/15/2016     |        | 6/17/2016     |        |
|-------------------|------------------|--------|---------------|---------|---------------|--------|---------------|--------|---------------|--------|---------------|--------|---------------|--------|
|                   | OD450 - OD570    |        | OD450 - OD570 |         | OD450 - OD570 |        | OD450 - OD570 |        | OD450 - OD570 |        | OD450 - OD570 |        | OD450 - OD570 |        |
|                   | well#1           | well#2 | well#1        | well#2  | well#1        | well#2 | well#1        | well#2 | well#1        | well#2 | well#1        | well#2 | well#1        | well#2 |
| <b>EMPTY</b>      | -0.006           | 0.006  | 0.0005        | -0.0005 | -0.002        | 0.002  | -0.004        | 0.004  | -0.002        | 0.002  | -0.031        | 0.031  | 0.042         | -0.042 |
| <b>Rv0125</b>     | -0.093           | -0.07  | 0.0855        | 0.0935  | 0.097         | 0.09   | 0.119         | 0.109  | 0.086         | 0.144  | 0.075         | 0.178  | 0.037         | 0.016  |
| <b>Rv0129</b>     | 0.027            | 0.086  | 0.0645        | 0.1165  | 0.096         | 0.106  | 0.103         | 0.131  | 0.134         | 0.174  | 0.16          | 0.206  | 0.272         | 0.163  |
| <b>Rv0379</b>     | -0.005           | 0.033  | 0.0495        | 0.0615  | 0.047         | 0.053  | 0.055         | 0.059  | 0.035         | 0.074  | -0.039        | 0.01   | -0.06         | -0.041 |
| <b>Rv0934</b>     | -0.007           | 0.003  | 0.1195        | 0.1155  | 0.111         | 0.134  | 0.101         | 0.173  | 0.12          | 0.148  | 0.111         | 0.123  | 0.046         | 0.09   |
| <b>Rv1009</b>     | -0.071           | -0.047 | 0.1465        | 0.1425  | 0.164         | 0.169  | 0.164         | 0.175  | 0.177         | 0.215  | 0.061         | 0.082  | -0.04         | 0.018  |
| <b>Rv1270</b>     | -0.022           | -0.178 | 0.1165        | 0.1545  | 0.1           | 0.093  | 0.139         | 0.162  | 0.121         | 0.129  | 0.029         | 0.06   | -0.117        | -0.114 |
| <b>Rv1411</b>     | -0.142           | -0.075 | 0.0585        | 0.0655  | 0.071         | 0.096  | 0.119         | 0.06   | 0.053         | 0.101  | -0.022        | -0.029 | -0.134        | -0.132 |
| <b>Rv1886</b>     | 0.097            | 0.11   | 0.1435        | 0.1625  | 0.133         | 0.131  | 0.195         | 0.222  | 0.192         | 0.284  | 0.702         | 0.789  | 1.296         | 1.727  |
| <b>Rv1980c</b>    | -0.062           | -0.08  | 0.2975        | 0.3705  | 0.156         | 0.168  | 0.183         | 0.214  | 0.141         | 0.166  | 0.253         | 0.226  | 0.108         | 0.308  |
| <b>Rv2031</b>     | -0.297           | -0.259 | 0.0025        | -0.0015 | 0.006         | 0.003  | -0.005        | -0.006 | 0.003         | 0.037  | -0.136        | -0.111 | -0.167        | -0.222 |
| <b>Rv2032</b>     | -0.153           | -0.129 | 0.0535        | 0.0615  | 0.062         | 0.07   | 0.058         | 0.064  | 0.07          | 0.065  | 0.014         | 0.155  | 0.307         | -0.046 |
| <b>Rv2873</b>     | -0.126           | -0.151 | 0.0415        | 0.0465  | 0.048         | 0.049  | 0.032         | 0.036  | 0.041         | 0.036  | -0.072        | -0.021 | -0.098        | -0.138 |
| <b>Rv2875</b>     | -0.126           | -0.081 | 0.0615        | 0.0615  | 0.064         | 0.069  | 0.054         | 0.05   | 0.056         | 0.06   | -0.052        | 0.014  | -0.084        | -0.118 |
| <b>Rv2945</b>     | -0.254           | -0.245 | 0.0335        | 0.0385  | 0.037         | 0.034  | 0.029         | 0.022  | 0.027         | 0.031  | -0.102        | -0.056 | -0.182        | -0.212 |
| <b>Rv3044</b>     | -0.054           | -0.033 | 0.0985        | 0.0965  | 0.108         | 0.108  | 0.087         | 0.09   | 0.098         | 0.098  | 0.031         | 0.107  | -0.02         | -0.026 |
| <b>Rv3804</b>     | -0.06            | -0.123 | 0.0445        | 0.0555  | 0.06          | 0.057  | 0.05          | 0.068  | 0.06          | 0.064  | 0.205         | 0.502  | 0.437         | 0.55   |
| <b>Rv3841</b>     | 0.261            | 0.02   | 0.0885        | 0.1465  | 0.115         | 0.126  | 0.199         | 0.162  | 0.181         | 0.176  | 0.43          | 0.803  | 0.567         | 0.578  |
| <b>Rv3874</b>     | -0.109           | -0.054 | 0.0395        | 0.0455  | 0.053         | 0.046  | 0.035         | 0.041  | 0.04          | 0.044  | -0.066        | -0.031 | -0.101        | -0.11  |
| <b>Rv3875</b>     | -0.273           | -0.249 | -0.0085       | -0.0085 | -0.003        | 0.001  | -0.016        | -0.016 | -0.013        | -0.01  | -0.137        | -0.118 | -0.172        | -0.213 |
| <b>Mtb Lysate</b> | 0.28             | 0.297  | 0.7385        | 0.8075  | 0.749         | 0.722  | 0.96          | 0.909  | 0.943         | 0.913  | 1.081         | 1.019  | 0.863         | 0.766  |
| <b>BCG Lysate</b> | 0.008            | 0.05   | 0.4265        | 0.4605  | 0.433         | 0.475  | 0.552         | 0.572  | 0.503         | 0.511  | 0.424         | 0.511  | 0.264         | 0.285  |
| <b>PPD</b>        | -0.19            | -0.134 | 0.0685        | 0.0835  | 0.075         | 0.079  | 0.088         | 0.095  | 0.08          | 0.087  | 0.03          | 0.113  | -0.114        | -0.067 |
